# Supplementary material
Source: publisher figshare collection journal article supplement (https://acs.figshare.com/ndownloader/files/3012924)
Supplement: Supplementary file 1 [file 3012924]

## Supporting Information

### Characterization of a Hemoglobin Adduct from Ethyl Vinyl Ketone Detected in Human Blood Samples

**Henrik Carlsson, Hitesh V. Motwani, Siv Osterman Golkar, Margareta  
Törnqvist\***

Department of Environmental Science and Analytical Chemistry, Stockholm University, SE-106 91  
Stockholm, Sweden

\*E-mail: [margareta.tornqvist@aces.su.se](mailto:margareta.tornqvist@aces.su.se)

#### Table of contents

**Figure S1:**  $^1\text{H}$  NMR spectrum of the synthesized reference standard, EVK-Val-FTH.

**Figure S2:** Proposed structures of fragments observed in the MS/MS fragmentation of EVK-Val-FTH.

**Figure S3:** Plot of adduct level versus dose of incubation, used to calculate the reaction rate constant toward N-terminal valine in Hb,  $k_{\text{HbVal-AA}}$ , for AA.

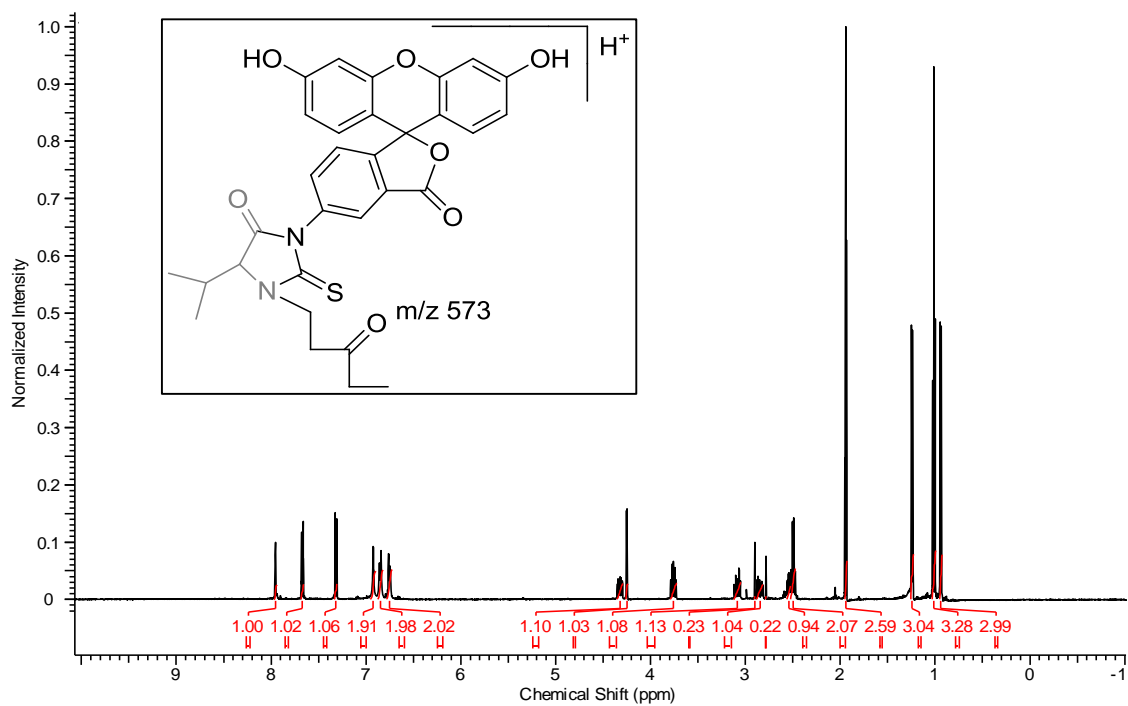

**Figure S1.** Structure of the analyte (insert) and <sup>1</sup>H NMR spectrum of the synthesized reference standard, recorded at 500 MHz in d<sub>3</sub>-ACN.

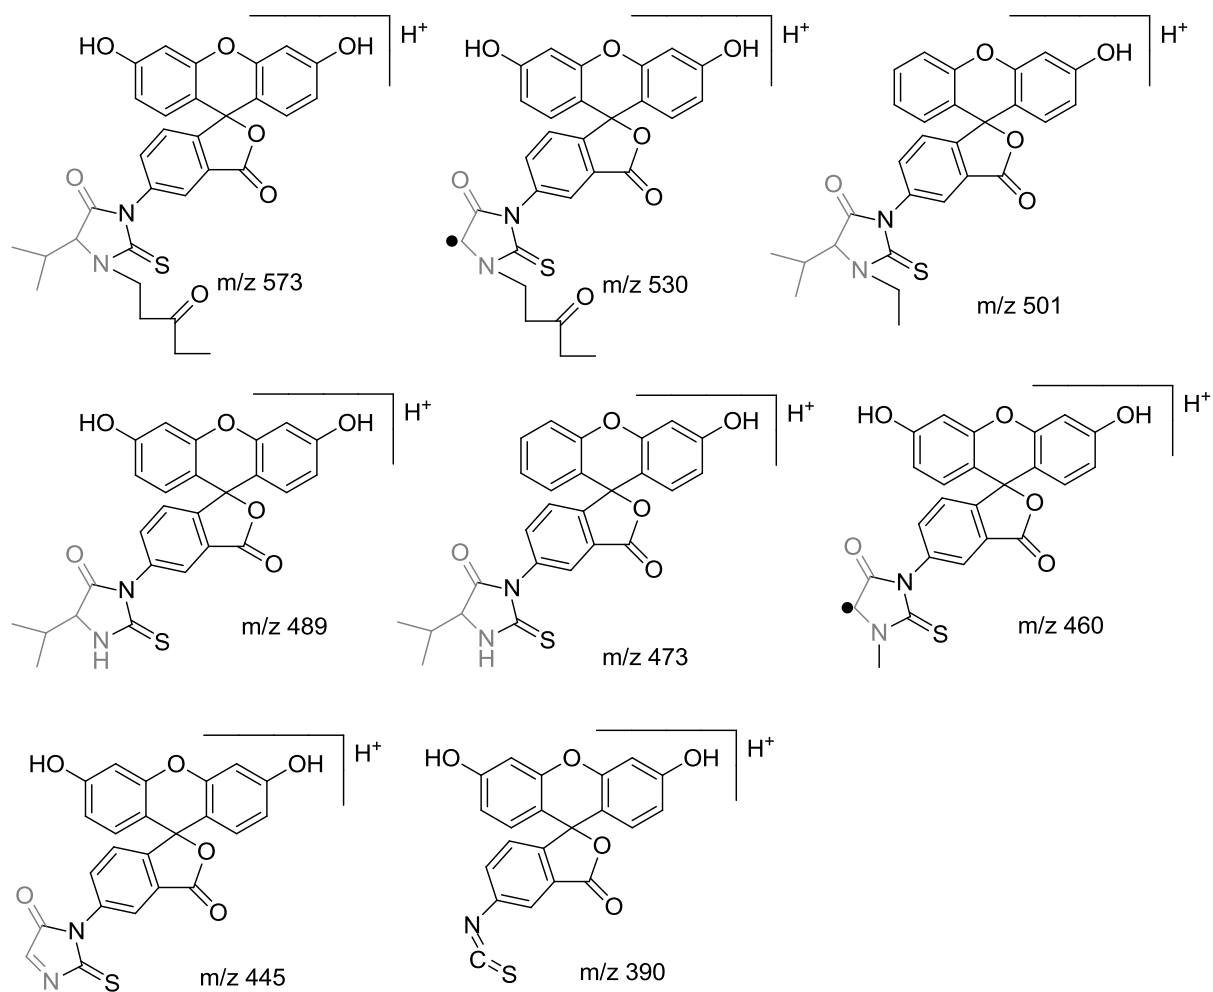

**Figure S2.** Proposed structures of fragments observed in the MS/MS fragmentation of EVK-Val-FTH.

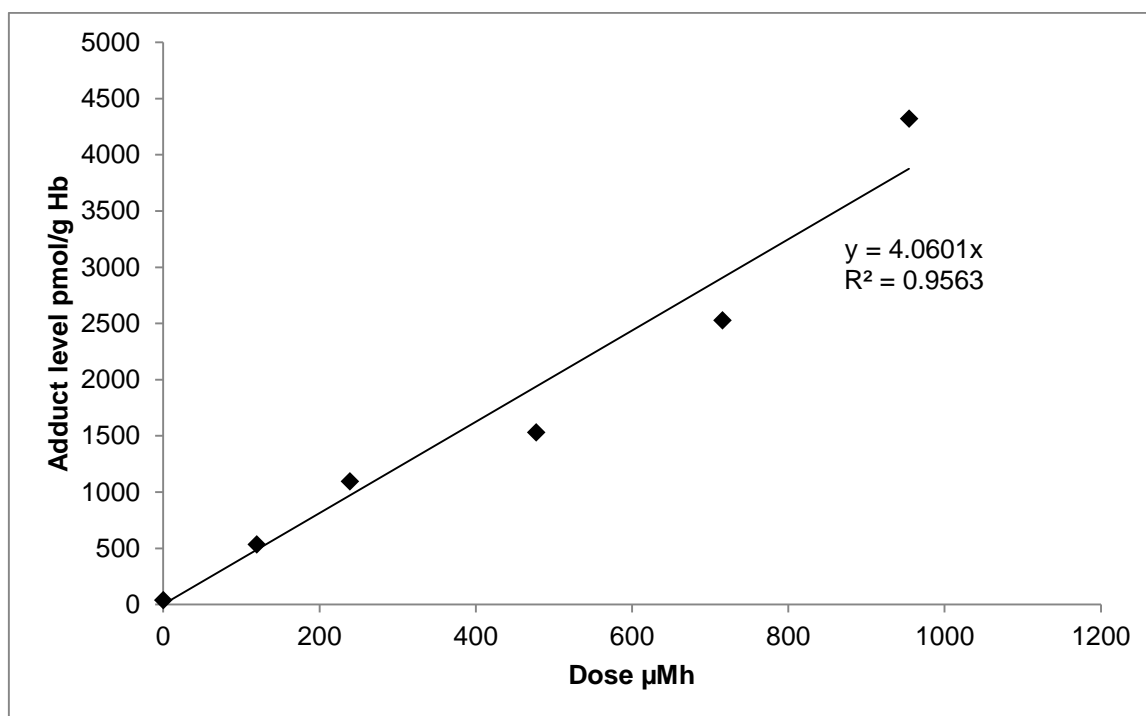

**Figure S3.** Plot of adduct level versus dose of incubation, used to calculate the reaction rate constant toward N-terminal valine in Hb,  $k_{HbVal-AA}$ , for AA. The reaction rate constant can be extracted as the slope of the linear regression curve of the data.
